# Supplementary material for: Assembly of USPIO/MOF nanoparticles with high proton relaxation rates for ultrasensitive magnetic resonance sensing
Source: Royal Society of Chemistry journal article supplement (doi:10.1039/d1tc01524a), 2021-01-01
Supplement: d1tc01524a1.pdf [file d1tc01524a1.pdf]

**Assembly of USPIO/MOF nanoparticles with high proton relaxation rates for ultrasensitive magnetic resonance sensing**

Zhou Xu <sup>a\*</sup>, Yanqiu Chen <sup>a</sup>, Maolong Chen <sup>a</sup>, Wei Chen <sup>b</sup> and Yunhui Cheng <sup>a\*</sup>

<sup>a</sup>College of Chemistry and Food Engineering, Changsha University of Science & Technology, Changsha 410114, China

<sup>b</sup>School of Food and Biological Engineering, Hefei University of Technology, Hefei 230009, China

\*Correspondence: Zhou Xu

Email: xz\_jnu@126.com

Yunhui Cheng

Email: chengyh6488@gmail.com

Tel: +86-731-85258322

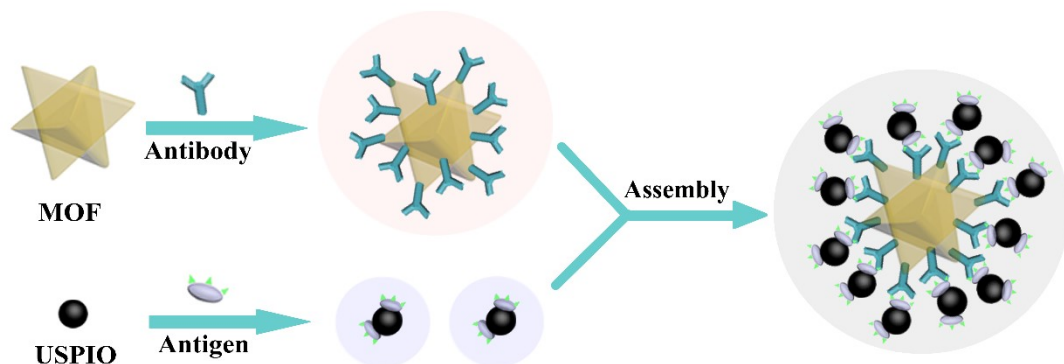

**Scheme S1** The fabrication and assembly of the USPIO/MOF.

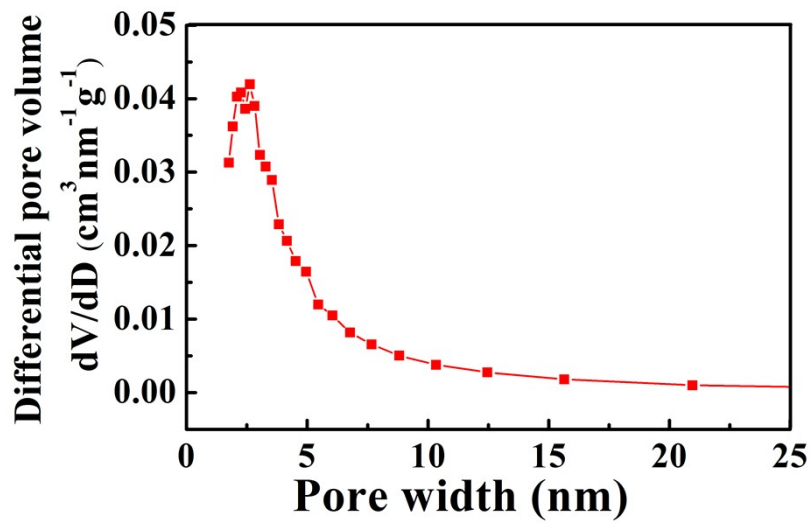

Fig. S1 Pore distributions of MOF.

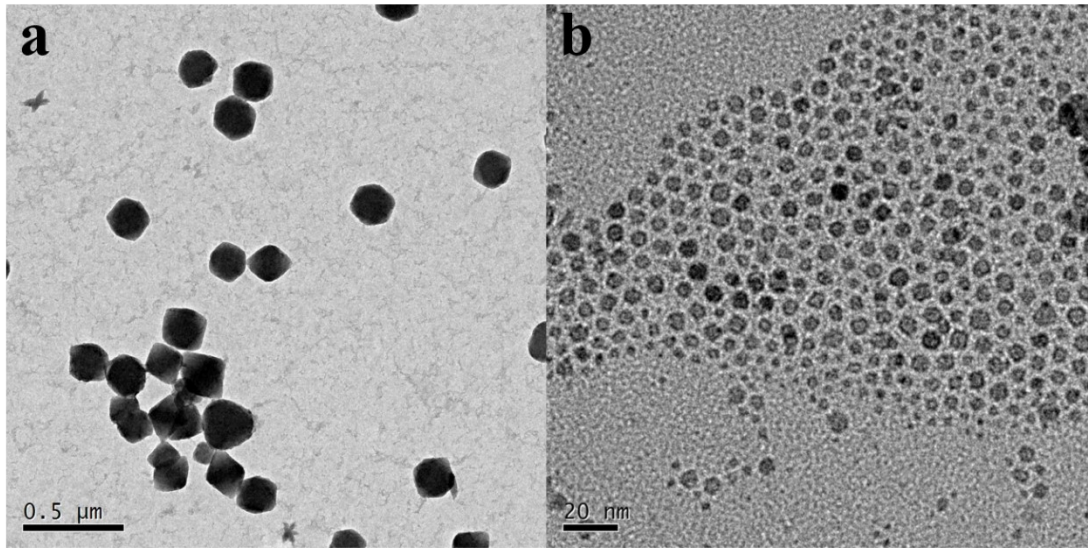

**Fig. S2** TEM of (a) Antibody-MOF and (b) Antigen-USPIO

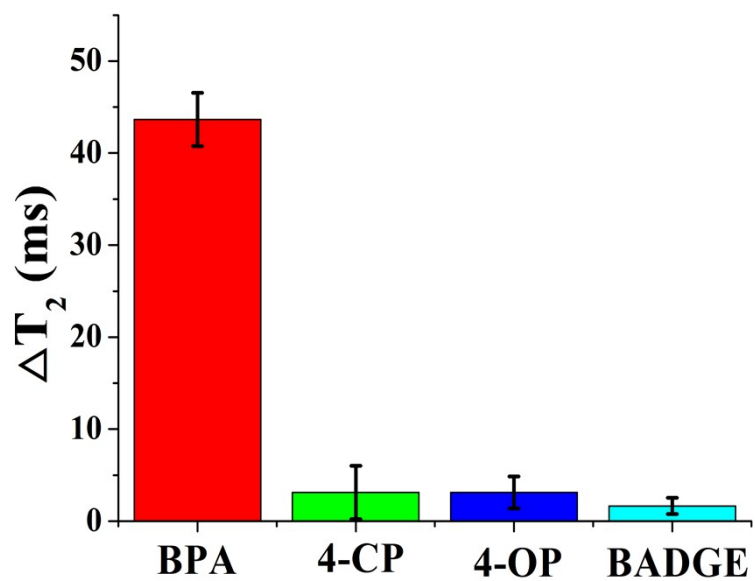

**Fig. S3**  $T_2$  of spiked BPA and its analogues following magnetic relaxation by the MRS (spiked with  $100 \text{ pg mL}^{-1}$  BPA and the  $500 \text{ pg mL}^{-1}$  analogues). The peak order of the compounds in the sensor analysis are BPA, 4-OP, 4-CP and BADGE respectively.

**Table S1**

Comparison for BPA detection between this work and references

| Determination method                       | Materials                                                   | Linear range<br>(ng mL <sup>-1</sup> ) | LOD<br>(ng mL <sup>-1</sup> ) | Refs.     |
|--------------------------------------------|-------------------------------------------------------------|----------------------------------------|-------------------------------|-----------|
| Electrochemical detection                  | Ultrasound assisted magnetic molecularly imprinted polymers | 15.98-2283                             | 2.0                           | 1         |
| Electrochemical Sensing                    | Molecular imprinting TiO <sub>2</sub> single crystals       | 2.28-4566                              | 0.69                          | 2         |
| Chemiluminescence determination            | Molecularly Imprinted Microspheres                          | 500-1500                               | 8.0                           | 3         |
| Fluorescence Sensing                       | FeOx/ZnS Nanocomposites                                     | 0.00-80                                | 0.36                          | 4         |
| Magnetic separation fluorescent aptasensor | NH <sub>2</sub> -Fe <sub>3</sub> O <sub>4</sub>             | 0.20-8.0                               | 0.047                         | 5         |
| Photoenhanced Electrochemical Detection    | Au Nanoparticles Decorated TiO <sub>2</sub> Nanotube Arrays | 22.83-8880.87                          | 1.42                          | 6         |
| Magnetic relaxation switch immunosensor    | Superparamagnetic iron oxide nanoparticles                  | 1.0-45                                 | 0.40                          | 7         |
| Magnetic resonance sensing                 | USPIO and MOF                                               | 0.005–1                                | 0.0013                        | This work |

## References

- 1 N. Ben Messaoud, A. Ait Lahcen, C. Dridi and A. Amine, *Sensor. Actuat. B-Chem.*, 2018, **276**, 304-312.
- 2 D. N. Pei, A. Y. Zhang, X. Q. Pan, Y. Si and H. Q. Yu, *Anal. Chem.*, 2018, **90**, 3165-3173.
- 3 Y. Xiong, Q. Wang, M. Duan, J. Xu, J. Chen and S. Fang, *Polymers-Basel*, 2018, **10**, 780.
- 4 X. Zhang, S. Yang, W. Chen, Y. Li, Y. Wei and A. Luo, *Polymers-Basel*, 2019, **11**, 1210.
- 5 M.-K. Li, L.-Y. Hu, C.-G. Niu, D.-W. Huang and G.-M. Zeng, *Sensor. Actuat. B-Chem.*, 2018, **266**, 805-811.
- 6 L. Hu, C. C. Fong, X. Zhang, L. L. Chan, P. K. Lam, P. K. Chu, K. Y. Wong and M. Yang, *Environ. Sci. Technol.*, 2016, **50**, 4430-4438.
- 7 Z. Xu, H. Kuang, W. Yan, C. Hao, C. Xing, X. Wu, L. Wang and C. Xu, *Biosens. Bioelectron.*, 2012, **32**, 183-187.
